# Supplementary material
Source: PubMed Central journal article supplement (PMC4319988)
Supplement: NIHMS646640-supplement-109_2014_1233_MOESM1_ESM.pdf [file NIHMS646640-supplement-109_2014_1233_MOESM1_ESM.pdf]

**Association of Mitochondrial DNA levels with Frailty and All-Cause Mortality**

Foram N. Ashar, B.S\*., Anna Moes, M.S\*., Ann Z. Moore, Ph.D., Megan L. Grove, M.S., Paulo H.M. Chaves, M.D., Ph.D., Josef Coresh, M.D., Ph.D., Anne B. Newman, M.D., M.P.H., Amy M. Matteini, Ph.D., Karen Bandeen-Roche, Ph.D., M.S., Eric Boerwinkle, Ph.D., Jeremy D. Walston, M.D., and Dan E. Arking, Ph.D.

From the McKusick-Nathans Institute of Genetic Medicine (F.N.A., A.M., D.E.A.), Department of Medicine (D.E.A.) and Division of Geriatric Medicine and Gerontology (A.M.M, J.D.W.), Johns Hopkins University School of Medicine, Baltimore, USA; Department of Epidemiology, Johns Hopkins Bloomberg School of Public Health, Baltimore, Maryland, USA (A.Z.M., J.C.); Human Genetics Center, School of Public Health, University of Texas Health Science Center at Houston, Houston, TX, USA (M.L.G., E.B.); Department of Epidemiology, Graduate School of Public Health, University of Pittsburgh, Pittsburgh, USA (A.B.N.); Department of Biostatistics, Johns Hopkins University, Baltimore, USA (K.B.R.); Benjamin Leon Center for Geriatric Research and Education and Department of Medicine, Florida International University, Miami, USA (P.H.M.C.)

\*Ms. Ashar and Ms. Moes contributed equally to this article.

**Word count:** 2,780

**Corresponding Author:**

Dan E. Arking, Ph.D.  
Johns Hopkins University School of Medicine  
733 N. Broadway  
Miller Research Building, Room 447  
Baltimore, MD 21205  
(410) 502-4867 Office  
(410) 614-8600 FAX  
[arking@jhmi.edu](mailto:arking@jhmi.edu)

**Supplementary Figure 1: Effects of mtDNA copy number on cause-specific mortality**

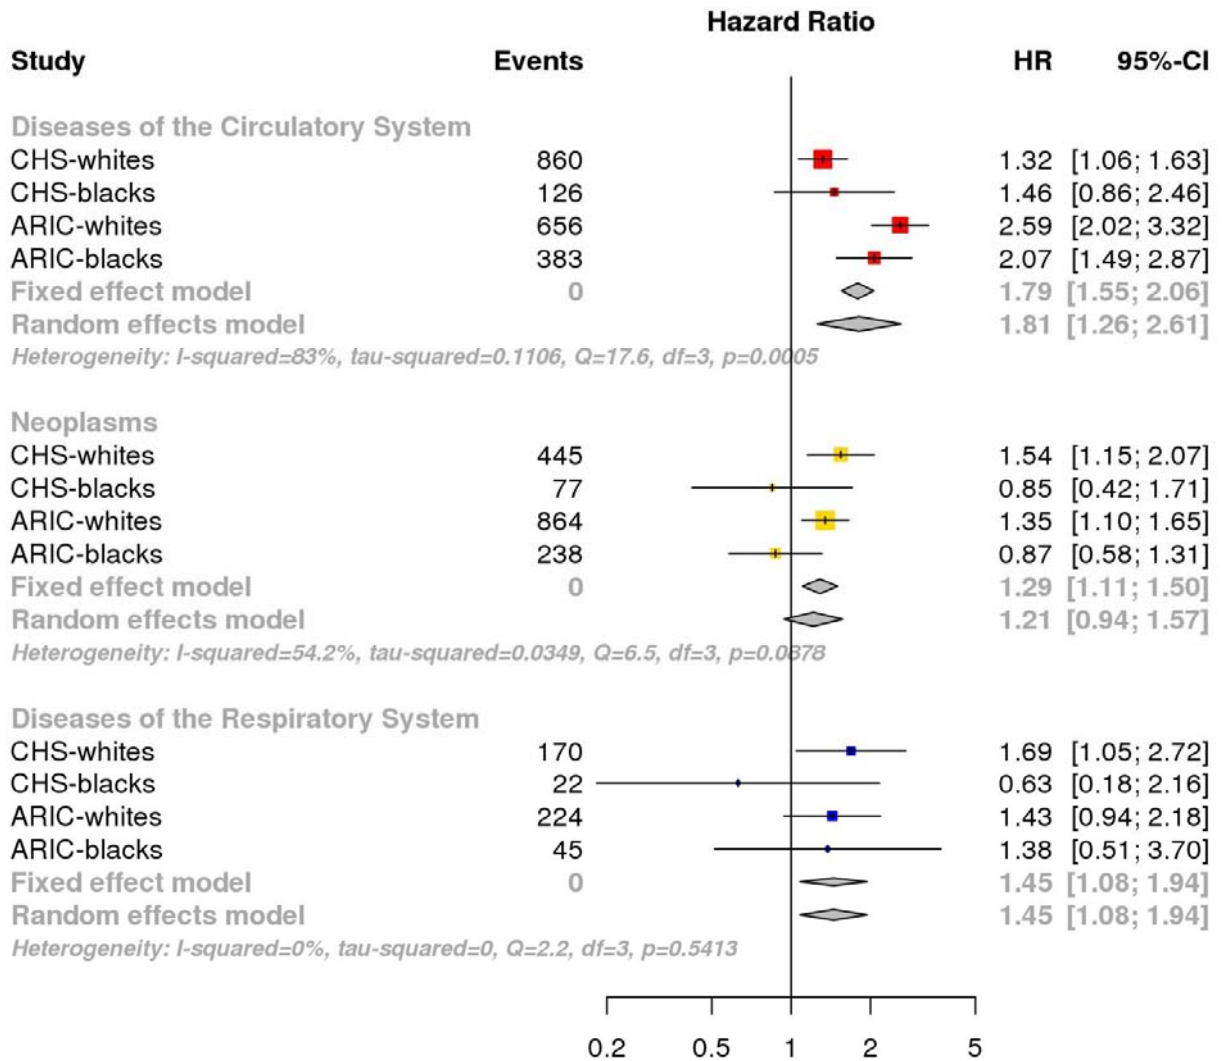

Hazards ratio reflect effect of lowest quintile of mtDNA relative to highest quintile on survival. Baseline models were adjusted for age, sex, and collection site. Heterogeneity between estimates of HR for subgroups of cause of death was evaluated using a random effects model. Diseases of the circulatory system were defined by ICD9 codes 390-459, neoplasms by 140-239 and diseases of the respiratory system by 460-519.

**Supplementary Table 1: Sample characteristics stratified by collection site-adjusted quintiles**

| <b>CHS-Whites</b>                 |                   |                   |                   |                   |                   |             |
|-----------------------------------|-------------------|-------------------|-------------------|-------------------|-------------------|-------------|
|                                   | <b>Quintile 1</b> | <b>Quintile 2</b> | <b>Quintile 3</b> | <b>Quintile 4</b> | <b>Quintile 5</b> | <b>Pval</b> |
| <b>No. of samples</b>             | 819               | 822               | 821               | 822               | 822               |             |
| <b>Age (in yrs)</b>               | 73.0 +/- 0.2      | 72.8 +/- 0.2      | 72.5 +/- 0.2      | 72.2 +/- 0.2      | 71.9 +/- 0.2      | <0.001      |
| <b>Number of males--no (%)</b>    | 407 (49.7)        | 409 (49.7)        | 368 (44.8)        | 328 (39.9)        | 302 (36.7)        | <0.001      |
| <b>Follow up time (in yrs)</b>    | 11.09 +/- 0.18    | 11.7 +/- 0.17     | 12.27 +/- 0.17    | 12.4 +/- 0.17     | 12.99 +/- 0.16    | <0.001      |
| <b>No. of deaths--no (%)</b>      | 580 ( 70.8 )      | 539 ( 65.7 )      | 494 ( 60.2 )      | 487 ( 59.3 )      | 430 ( 52.3 )      | <0.001      |
| <b>Mean age at death (in yrs)</b> | 83.15 +/- 0.27    | 83.4 +/- 0.26     | 83.7 +/- 0.28     | 83.26 +/- 0.27    | 83.49 +/- 0.3     | 0.42        |
| <b>CHS-Blacks</b>                 |                   |                   |                   |                   |                   |             |
|                                   | <b>Quintile 1</b> | <b>Quintile 2</b> | <b>Quintile 3</b> | <b>Quintile 4</b> | <b>Quintile 5</b> | <b>Pval</b> |
| <b>No. of samples</b>             | 156               | 157               | 156               | 157               | 157               |             |
| <b>Age (in yrs)</b>               | 74.0 +/- 0.5      | 73.1 +/- 0.5      | 72.8 +/- 0.5      | 72.5 +/- 0.4      | 72.2 +/- 0.4      | 0.002       |
| <b>Number of males--no (%)</b>    | 74 (47.44)        | 53 (33.76)        | 52 (33.33)        | 62 (39.49)        | 61 (38.85)        | 0.18        |
| <b>Follow up time (in yrs)</b>    | 9.86 +/- 0.34     | 10.19 +/- 0.36    | 10.15 +/- 0.35    | 10.98 +/- 0.34    | 10.67 +/- 0.35    | 0.03        |
| <b>No. of deaths--no (%)</b>      | 94 ( 0.6026 )     | 87 ( 0.5541 )     | 92 ( 0.5897 )     | 73 ( 0.465 )      | 83 ( 0.5287 )     | 0.07        |
| <b>Mean age at death (in yrs)</b> | 82.77 +/- 0.73    | 82.18 +/- 0.71    | 81.72 +/- 0.74    | 81.86 +/- 0.77    | 81.2 +/- 0.67     | 0.09        |
| <b>ARIC-Whites</b>                |                   |                   |                   |                   |                   |             |
|                                   | <b>Quintile 1</b> | <b>Quintile 2</b> | <b>Quintile 3</b> | <b>Quintile 4</b> | <b>Quintile 5</b> | <b>Pval</b> |
| <b>No. of samples</b>             | 1804              | 1805              | 1805              | 1805              | 1805              | NA          |
| <b>Age (in yrs)</b>               | 58.85 +/- 0.14    | 58.23 +/- 0.14    | 58.13 +/- 0.14    | 57.84 +/- 0.14    | 57.56 +/- 0.14    | <0.001      |
| <b>Number of males--no (%)</b>    | 896 (49.7)        | 853 (47.3)        | 845 (46.8)        | 814 (45.1)        | 835 (46.3)        | 0.002       |
| <b>Follow up time (in yrs)</b>    | 15.77 +/- 0.13    | 16.66 +/- 0.12    | 16.58 +/- 0.11    | 17.14 +/- 0.1     | 17.03 +/- 0.11    | <0.001      |
| <b>No. of deaths--no (%)</b>      | 638 (35.4)        | 497 (27.5)        | 501 (27.8)        | 399 (22.1)        | 400 (22.2)        | <0.001      |
| <b>Mean age at death (in yrs)</b> | 72.05 +/- 0.31    | 72.7 +/- 0.34     | 72.97 +/- 0.32    | 71.91 +/- 0.38    | 72.26 +/- 0.38    | 0.68        |
| <b>ARIC-Blacks</b>                |                   |                   |                   |                   |                   |             |
|                                   | <b>Quintile 1</b> | <b>Quintile 2</b> | <b>Quintile 3</b> | <b>Quintile 4</b> | <b>Quintile 5</b> | <b>Pval</b> |
| <b>No. of samples</b>             | 496               | 497               | 496               | 497               | 497               | NA          |
| <b>Age (in yrs)</b>               | 57.99 +/- 0.28    | 57.28 +/- 0.27    | 57.3 +/- 0.27     | 57.18 +/- 0.27    | 56.64 +/- 0.26    | 0.002       |
| <b>Number of males--no (%)</b>    | 188 (37.9)        | 178 (35.8)        | 193 (38.9)        | 185 (37.2)        | 177 (35.6)        | 0.68        |
| <b>Follow up time (in yrs)</b>    | 14.5 +/- 0.28     | 15.44 +/- 0.25    | 15.77 +/- 0.24    | 15.87 +/- 0.23    | 16.32 +/- 0.23    | <0.001      |
| <b>No. of deaths--no (%)</b>      | 225 (45.4)        | 195 (39.2)        | 185 (37.3)        | 172 (34.6)        | 150 (30.2)        | <0.001      |
| <b>Mean age at death (in yrs)</b> | 69.43 +/- 0.53    | 69.99 +/- 0.54    | 70.21 +/- 0.52    | 70.09 +/- 0.61    | 69.89 +/- 0.63    | 0.8         |

Data are presented as Mean±SD. Quintiles were calculated from collection site- (and PCs for ARIC) adjusted mtDNA copy number (details in Methods). ‘Pval for trend’ is the pvalue for effect of trait on standardized mtDNA copy number as a continuous variable.

**Supplementary Table 2: Sample characteristics stratified by whether participants were included in the study.**

**CHS**

|                                                 | <b>Included</b> | <b>Excluded</b> |
|-------------------------------------------------|-----------------|-----------------|
| <b>No. of samples</b>                           | 4,892           | 995             |
| <b>Age at visit1 (in yrs)</b>                   | 72.6 +/- 5.5    | 74.3 +/- 6.0    |
| <b>Number of males--no (%)</b>                  | 2,118 ( 43.3 )  | 377 ( 37.9 )    |
| <b>Follow up time from visit1 (in yrs)</b>      | 11.8 +/- 4.9    | 10.8 +/- 4.9    |
| <b>No. of deaths--no (%)</b>                    | 2,960 ( 60.5 )  | 726 ( 72.9 )    |
| <b>Prevalent CHD at visit1--no (%)</b>          | 917 ( 18.7 )    | 237 ( 23.8 )    |
| <b>Prevalent diabetes at visit1--no (%)</b>     | 763 ( 15.6 )    | 190 (19.1 )     |
| <b>Prevalent hypertension at visit1--no (%)</b> | 2,858 ( 58.4 )  | 599 ( 60.2 )    |

**ARIC**

|                                                   | <b>Included</b> | <b>Excluded</b> |
|---------------------------------------------------|-----------------|-----------------|
| <b>No. of samples</b>                             | 11,509          | 4,283           |
| <b>Age at baseline (in yrs)</b>                   | 54.0 +/- 5.7    | 54.4 +/- 5.9    |
| <b>Number of males--no (%)</b>                    | 5,166 ( 44.9 )  | 1,916 ( 44.7 )  |
| <b>Follow up time from baseline (in yrs)</b>      | 19.7 +/- 5.1    | 18.1 +/- 6.6    |
| <b>No. of deaths--no (%)</b>                      | 3,362 ( 29.2 )  | 1,548 ( 36.1 )  |
| <b>Prevalent CHD at baseline--no (%)</b>          | 566 ( 5.0 )     | 200 ( 4.8 )     |
| <b>Prevalent diabetes at baseline--no (%)</b>     | 1,267 ( 11.1 )  | 603 (14.3 )     |
| <b>Prevalent hypertension at baseline--no (%)</b> | 3,832 ( 33.5 )  | 1,672 ( 39.3 )  |

Data are presented as Mean +/- standard deviation.

**Supplementary Table 3: Detailed breakdown of time of DNA collection by cohort**

**CHS**

|               |           |               |
|---------------|-----------|---------------|
| <b>Whites</b> | <b>BL</b> | <b>BL + 3</b> |
|               | 4,104     | 4             |
| <b>Blacks</b> | <b>BL</b> | <b>BL + 3</b> |
|               | 194       | 578           |

**ARIC**

|               |               |               |               |               |
|---------------|---------------|---------------|---------------|---------------|
| <b>Whites</b> | <b>visit1</b> | <b>visit2</b> | <b>visit3</b> | <b>visit4</b> |
|               | 367           | 7,201         | 1,395         | 32            |
| <b>Blacks</b> | <b>visit1</b> | <b>visit2</b> | <b>visit3</b> | <b>visit4</b> |
|               | 117           | 1,922         | 398           | 35            |

CHS DNA was isolated at baseline (BL) for majority of the white participants, and at a subsequent visit 3 years following baseline for majority of the black participants.

ARIC visits were carried out 2-3 years apart—visit1 (1987-89), visit2 (1990-92), visit3 (1993-95), and visit4 (1996-98).
